# Supplementary material for: High-yield gram-scale organic synthesis using accelerated microdroplet/thin film reactions with solvent recycling
Source: Royal Society of Chemistry journal article supplement (doi:10.1039/c9sc06265c), 2020-01-01
Supplement: c9sc06265c1.pdf [file c9sc06265c1.pdf]

# Speeding Up Reactions by Spraying and Recycling Solvents

Spraying solution as microdroplets can accelerate reactions by factors of  $10^1$  to  $10^5$  compared to reactions with bulk liquid

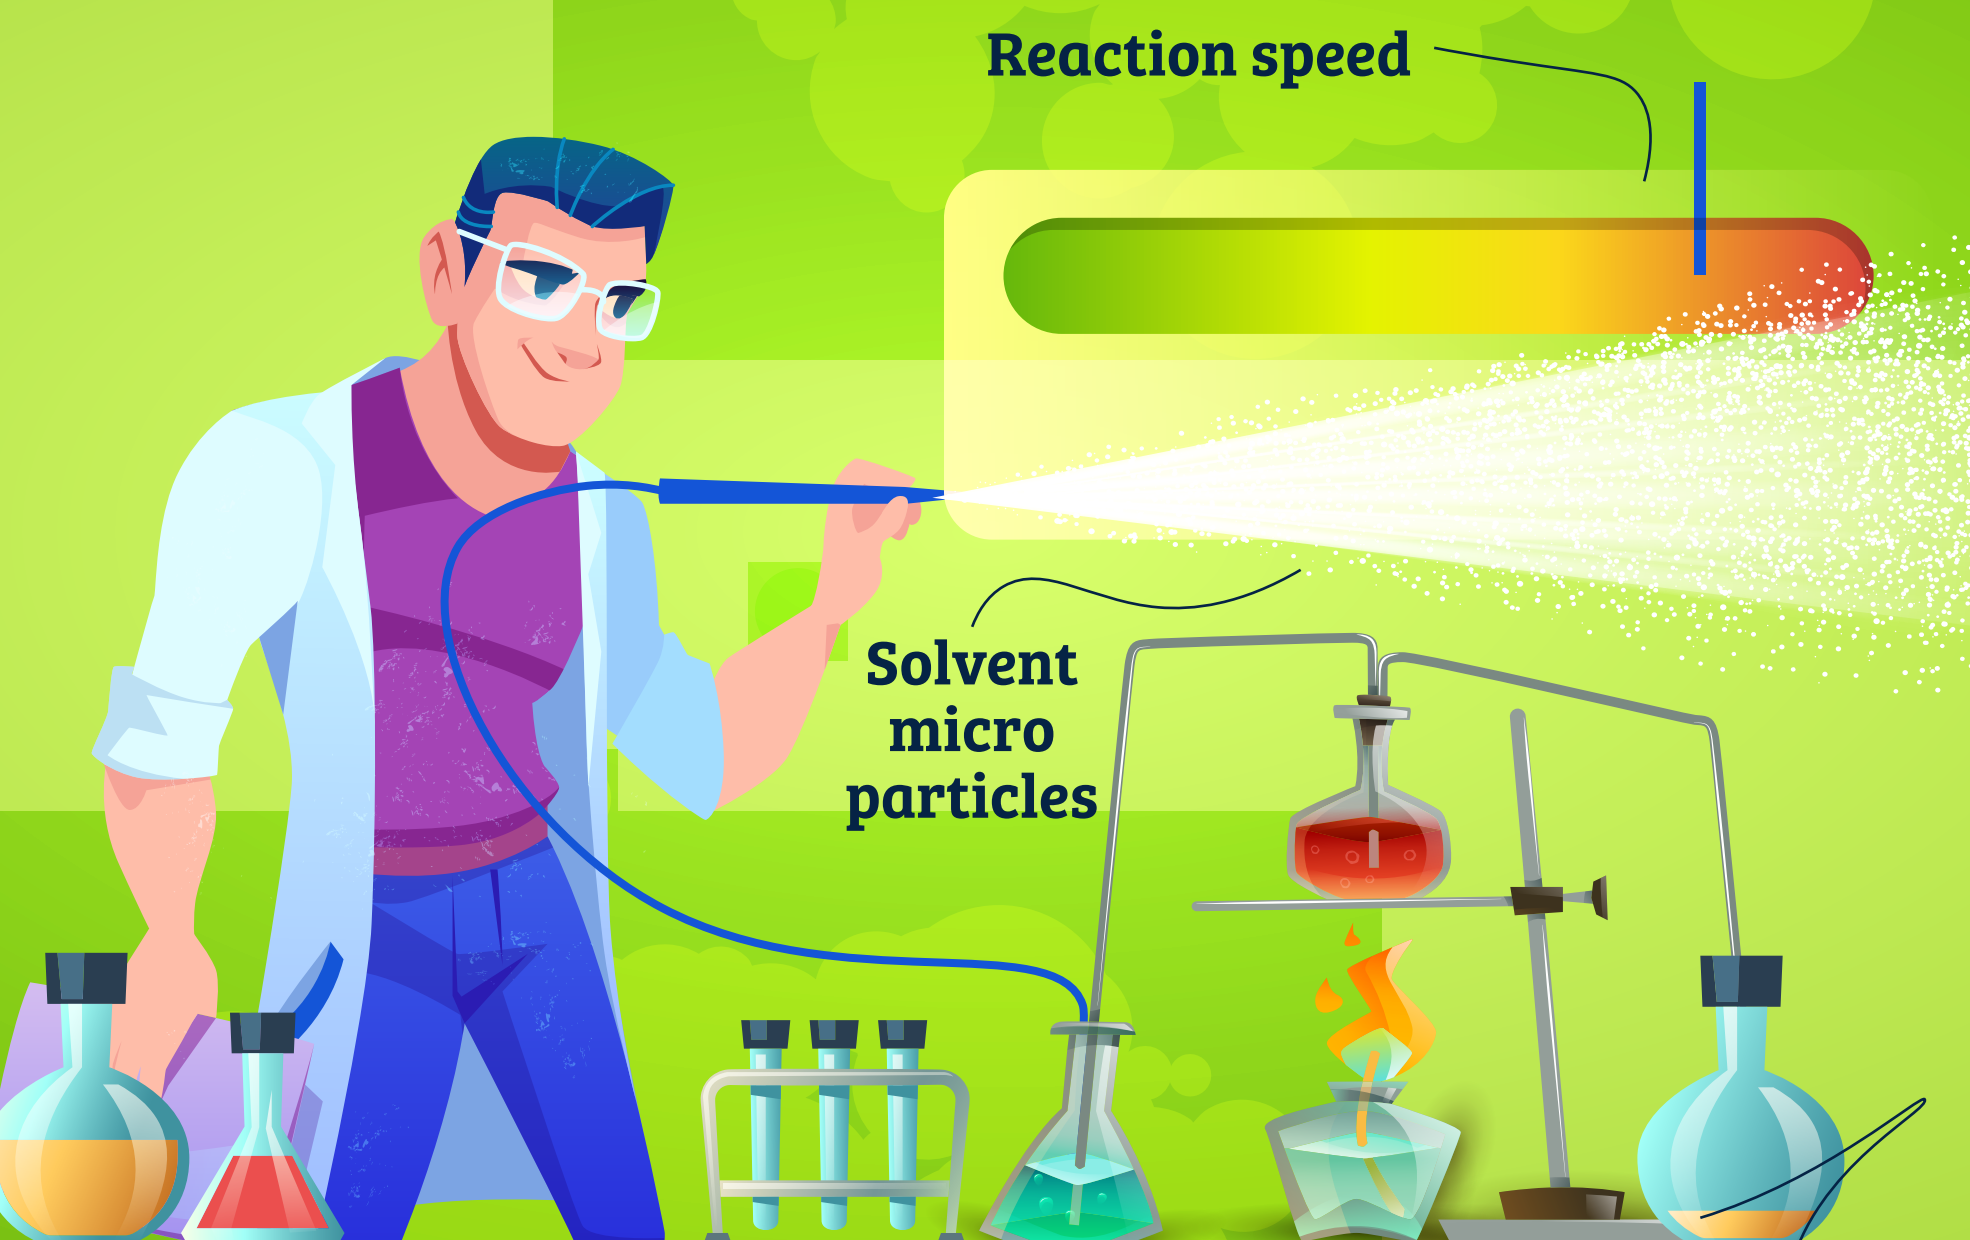

But the short lifetimes of microdroplets limit product yield and reaction scalability, preventing practical use

Can a microdroplet reaction system be designed to overcome these issues?

Microdroplet reaction system including the solvent recycling process

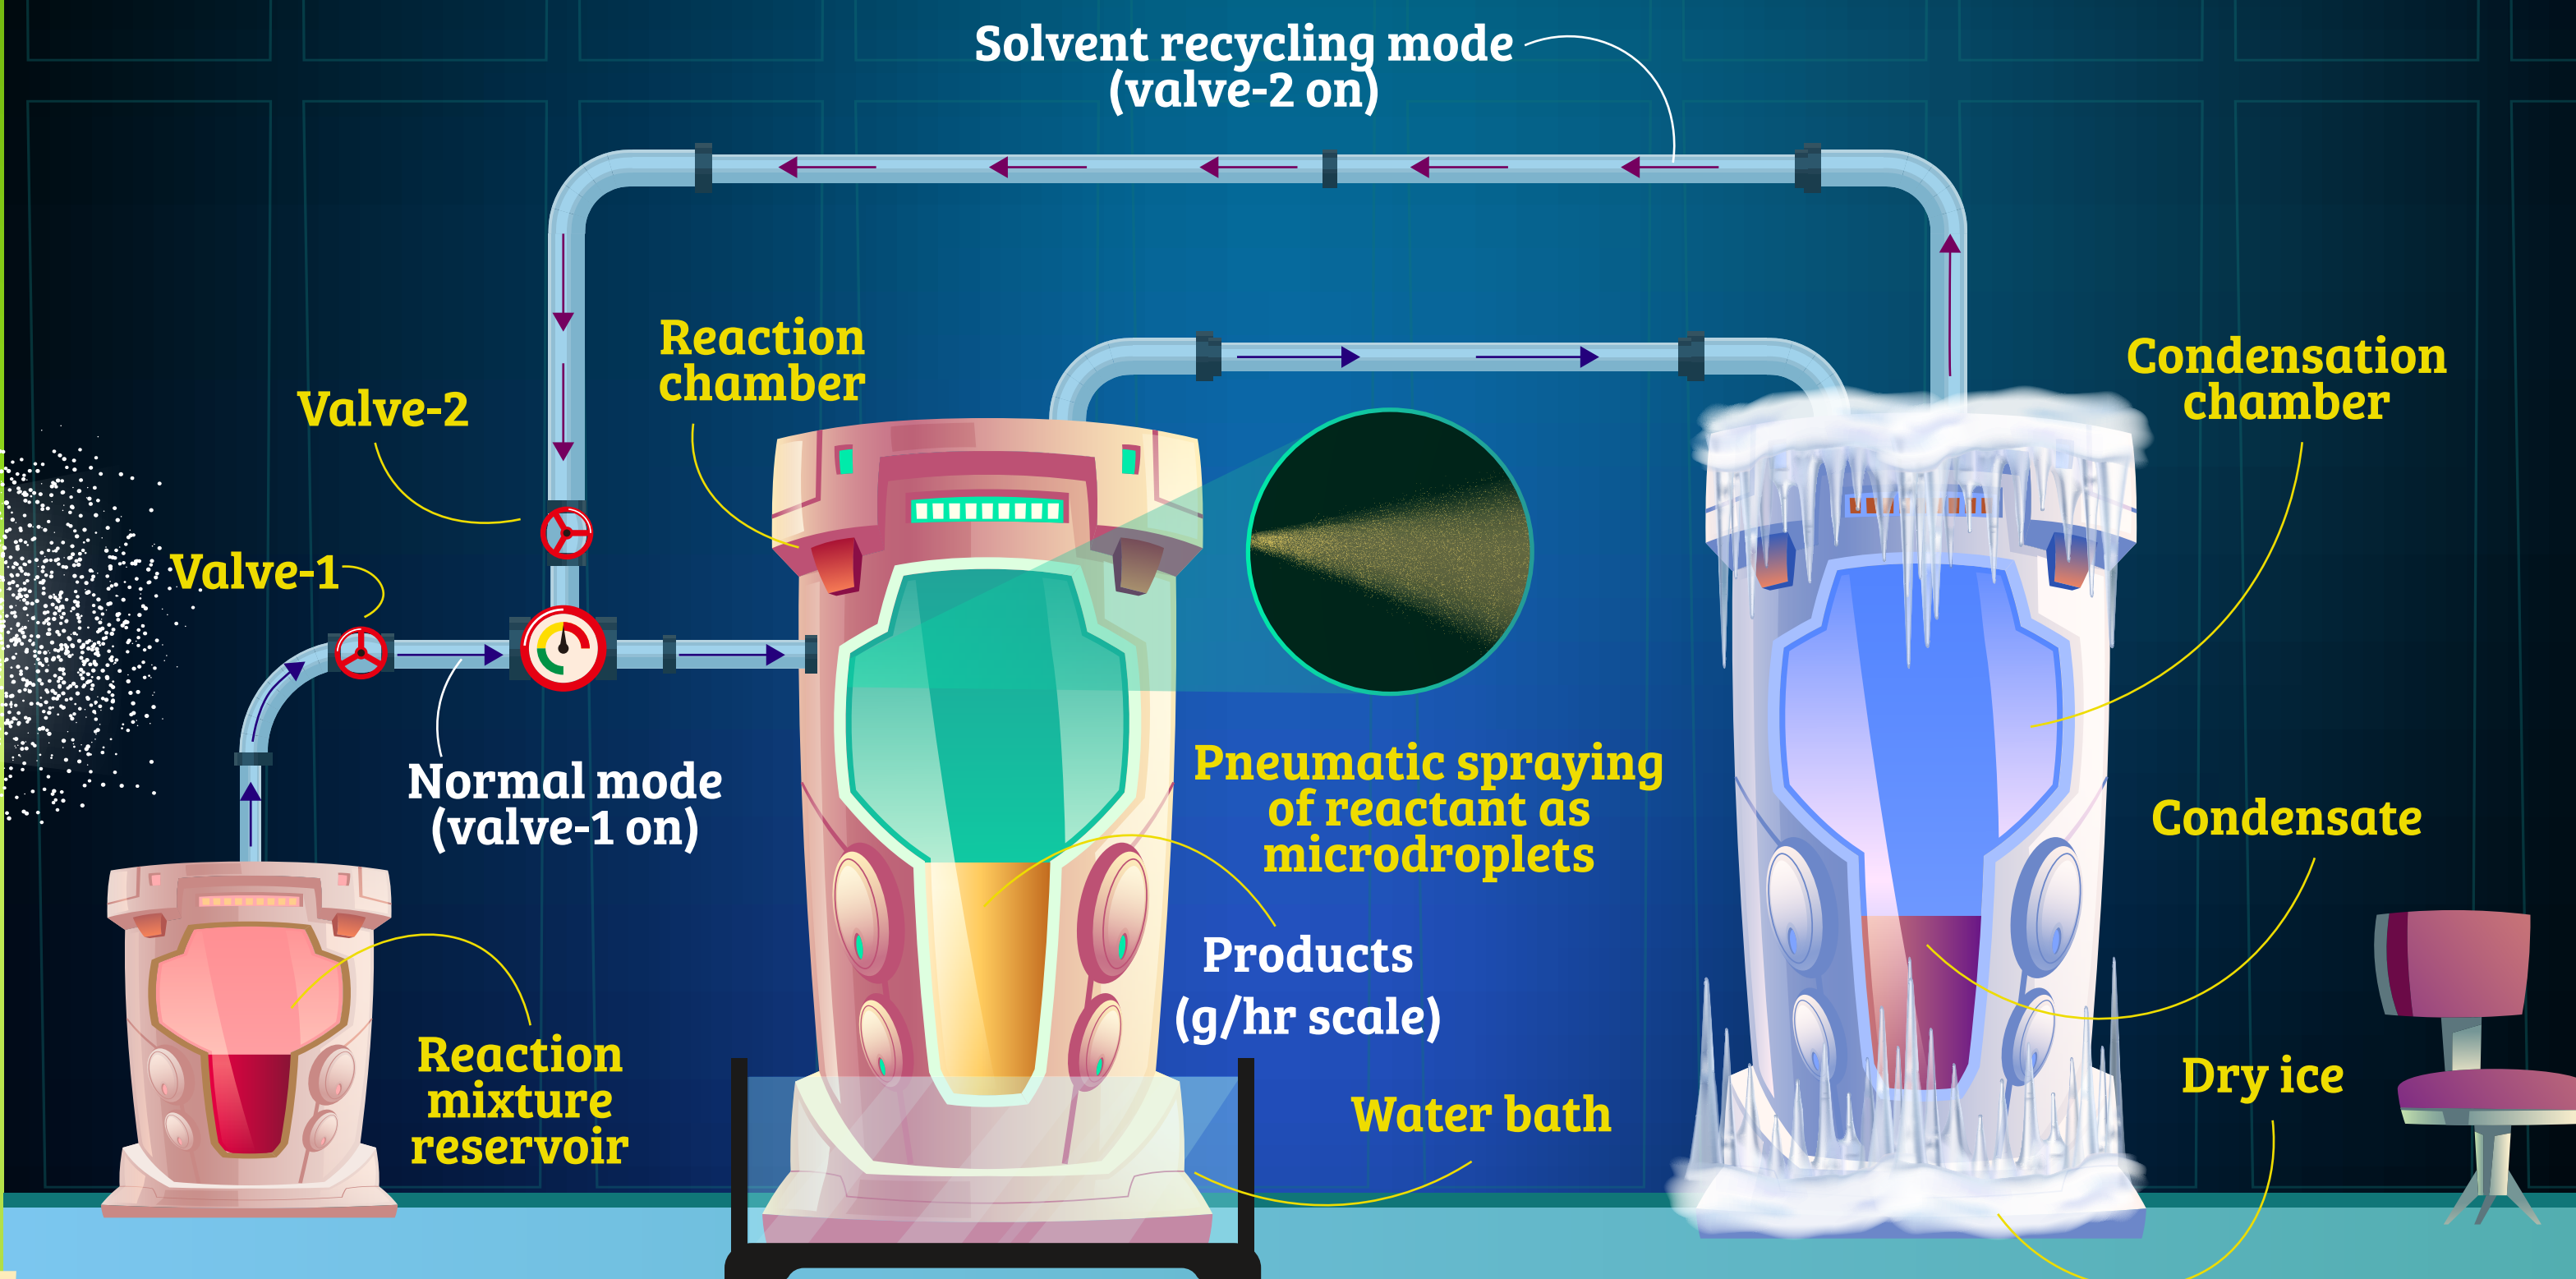

Including a solvent recycling process in microdroplet reaction systems reduces wastage and increases droplet lifetime, thereby significantly enhancing yield and reaction speed

Chemical  
Science

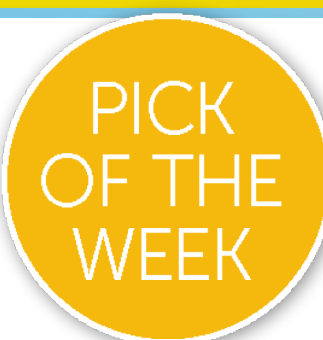

High-yield gram-scale organic synthesis using accelerated microdroplet/thin film reactions with solvent recycling

Cooks *et al.* (2020) | DOI: 10.1039/C9SC06265C

ROYAL SOCIETY  
OF CHEMISTRY
